# Supplementary material for: Facile and Low-Cost SPE Modification Towards Ultra-Sensitive Organophosphorus and Carbamate Pesticide Detection in Olive Oil
Source: MDPI journal article supplement (doi:10.3390/molecules25214988), 2020-10-28
Supplement: s1 [file s1]

# Facile and Low-Cost SPE Modification Towards Ultra-Sensitive Organophosphorus and Carbamate Pesticide Detection in Olive Oil

Dionysios Soulis <sup>1</sup>, Marianna Trigazi <sup>1</sup>, George Tsekenis <sup>1</sup>, Chrysoula Chandrinou <sup>2</sup>, Apostolos Klinakis <sup>1</sup> and Ioanna Zergioti <sup>2,\*</sup>

<sup>1</sup> Biomedical Research Foundation of the Academy of Athens, Soranou Ephessiou 4, 11527 Athens, Greece; dsoulis1@gmail.com (D.S.); mtrigazi@gmail.com (M.T.); gtsekenis@bioacademy.gr (G.T.); aklinakis@bioacademy.gr (A.K.)

<sup>2</sup> School of Mathematical and Physical Sciences, Physics Department, National Technical University of Athens, Heroon Polytehneiou 9, 157 80 Athens, Greece; cchandr@mail.ntua.gr

\* Correspondence: zergioti@central.ntua.gr

Academic Editor: Gregorio F. Ortiz

Received: 9 August 2020; Accepted: 23 October 2020; Published: date

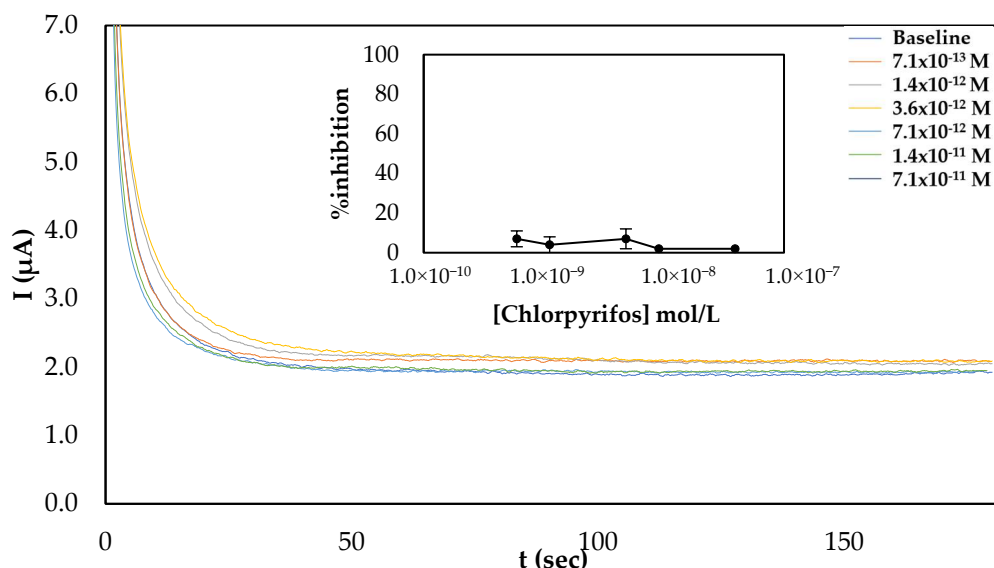

**Figure S1.** Characteristic amperograms of current recorded over time for the uninhibited enzyme (baseline) and following incubation with increasing concentrations of chlorpyrifos (standard samples) for CB/CS/AChE-modified electrodes fabricated following multistep approach at a constant applied potential of +250mV. The graph shown in the insets show the mean % inhibition of different concentrations of chlorpyrifos obtained from 5 different electrodes.

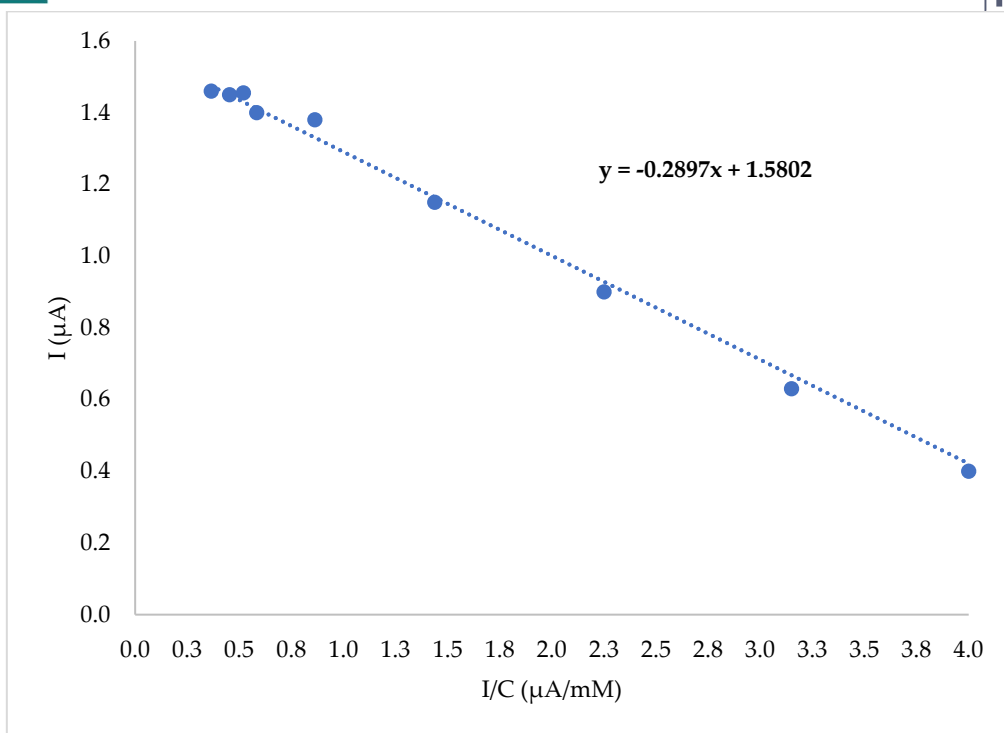

(a)

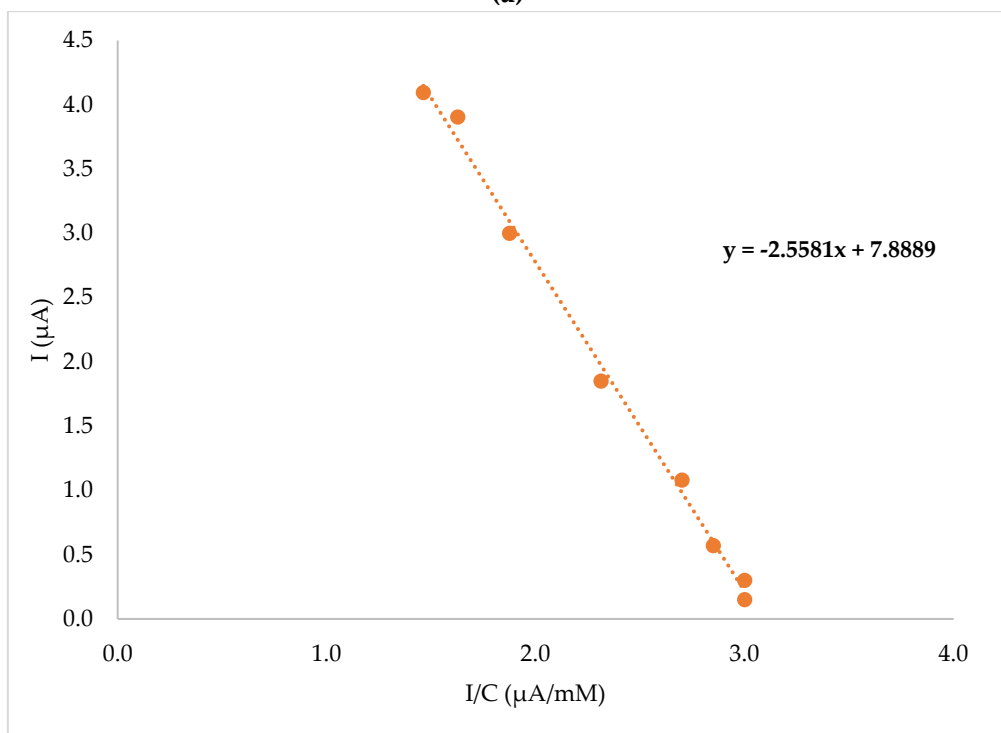

(b)

**Figure S2.** Eadie–Hofstee diagram for the Eadie-Hofstee plot for the determination of the apparent Michaelis-Menten constant  $K_m$  of the a) entrapped AChE on sensors fabricated using the one-step approach and b) crosslinked enzyme on sensors fabricated using the multistep approach.

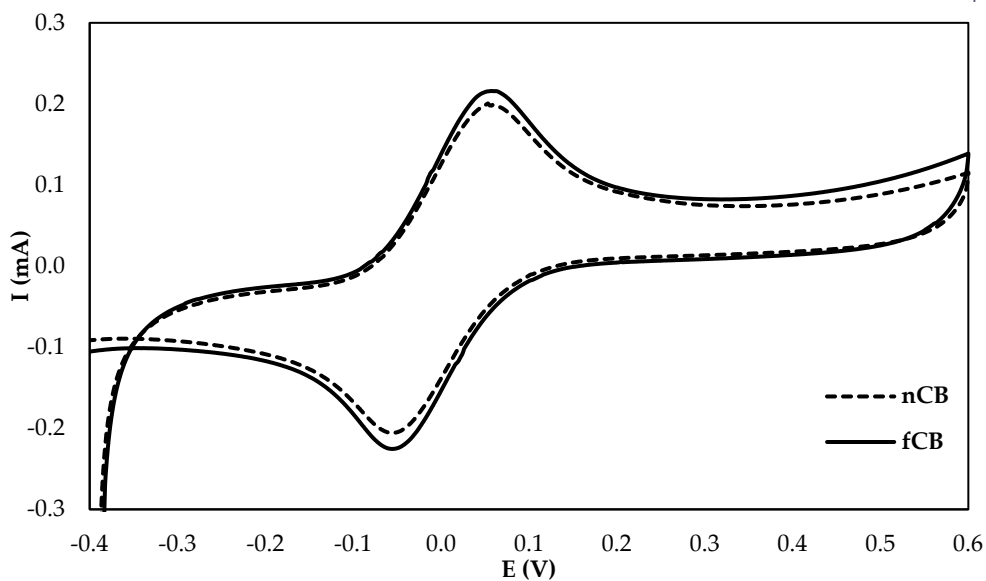

**Figure S3.** Cyclic voltammograms of 5mM  $K_3Fe(CN)_6/K_4Fe(CN)_6$  in 1xPBS on CB/CS-modified carbon SPEs and fCB/CS-modified carbon SPEs. Scan rate 50mV/sec.

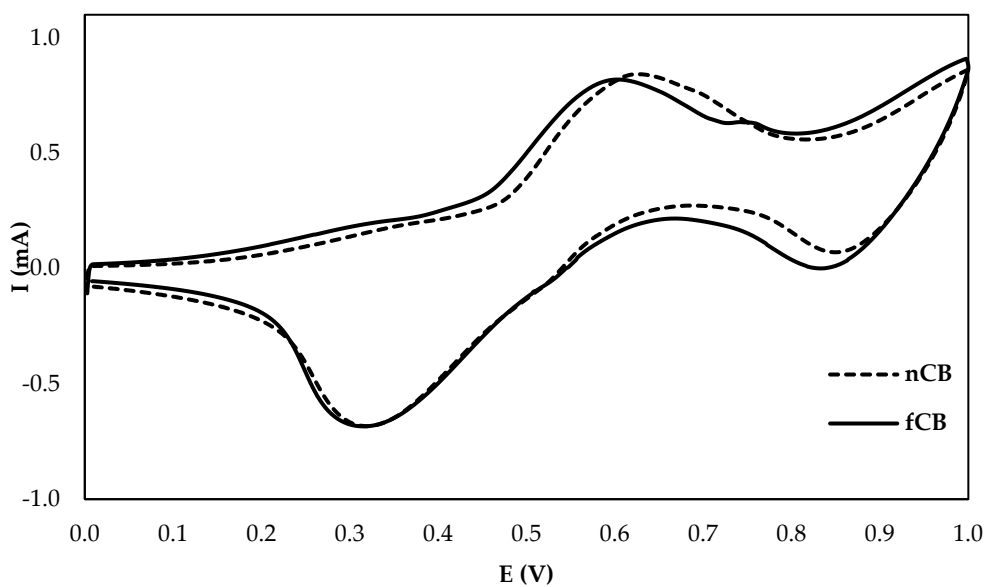

**Figure S4.** Cyclic voltammograms of 10mM AChI on CB/CS-modified carbon SPEs and fCB/CS-modified carbon SPEs at a scan rate of 50mV/sec.

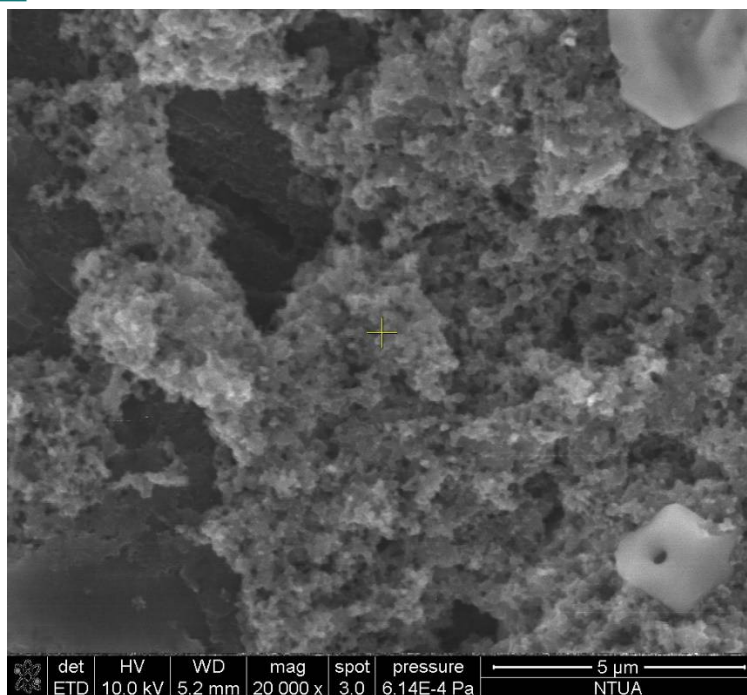

**(a)**

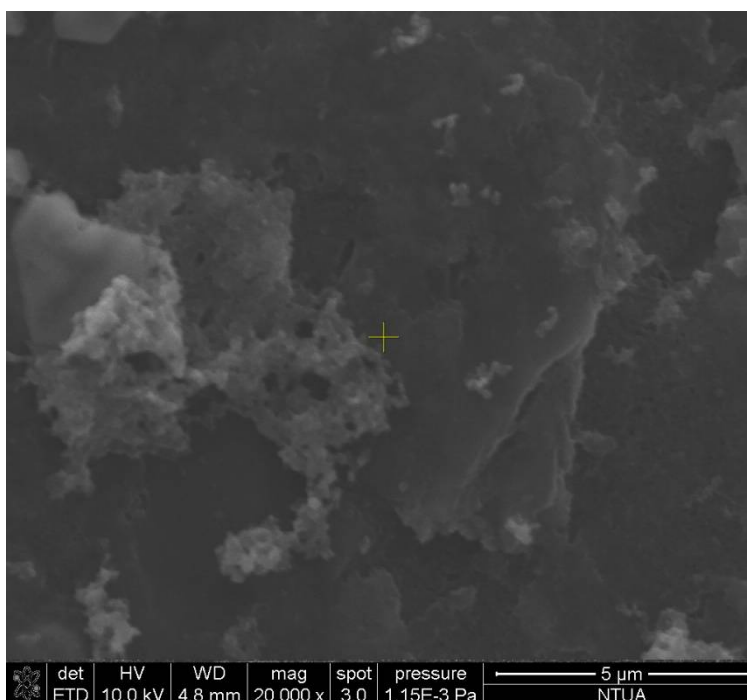

**(b)**

**Figure S5** SEM images for electrode surfaces modified with **(a)** non-functionalized CB and **(b)** functionalized CB. In both cases the CB particles were dispersed in a CS mesh.
